# Supplementary material for: The colorimetric and microfluidic paper-based detection of cysteine and homocysteine using 1,5-diphenylcarbazide-capped silver nanoparticles
Source: Royal Society of Chemistry journal article supplement (doi:10.1039/d0ra08615k), 2021-01-01
Supplement: d0ra08615k1.pdf [file d0ra08615k1.pdf]

### Electronic Supplementary Information

#### Colorimetric and microfluidic paper-based detection of cysteine using 1,5-diphenylcarbazine capped silver nanoparticles

Sattar Shariati, Gholamreza Khayatian\*

*Department of Chemistry, Faculty of Science, University of Kurdistan, Sanandaj, Iran*

*RSC Advances*

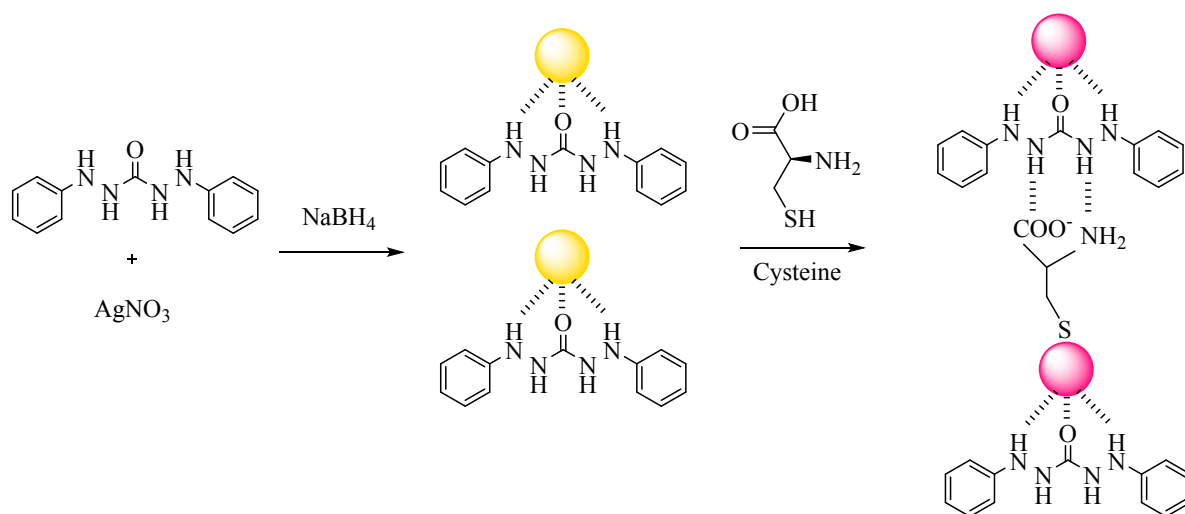

**Fig.S1.** A possible mechanism for aggregation of DPC-AgNPs in the presence of cysteine

The bonding status of 1,5-diphenylcarbazide (DPC) on the surface of the Ag nanoparticle was characterized using FTIR spectroscopy and the results are shown in FTIR spectrum (Fig S2).

In the DPC, IR spectra, the strong peaks at  $1710\text{ cm}^{-1}$  is attributed to C=O stretching vibration. The peaks at  $732\text{ cm}^{-1}$ ,  $796\text{ cm}^{-1}$ ,  $3097\text{ cm}^{-1}$  and  $3330\text{ cm}^{-1}$  can be attributed to the wagging and stretching vibration of -NH groups in DPC. When DPC are coated onto the surface of AgNPs, the carboxylic peak is shifted from  $1710\text{ cm}^{-1}$  to  $1627\text{ cm}^{-1}$  and peaks of amine groups are expanding and disappearing. Comparing of the two spectra (a, b) of pure DPC and DPC-AgNPs, is concluded that DPC located on AgNPs. Decrease in peak intensity of C=O stretching bond and shifted to  $1616\text{ cm}^{-1}$  may be due to interaction of Cys with DPC-AgNPs.

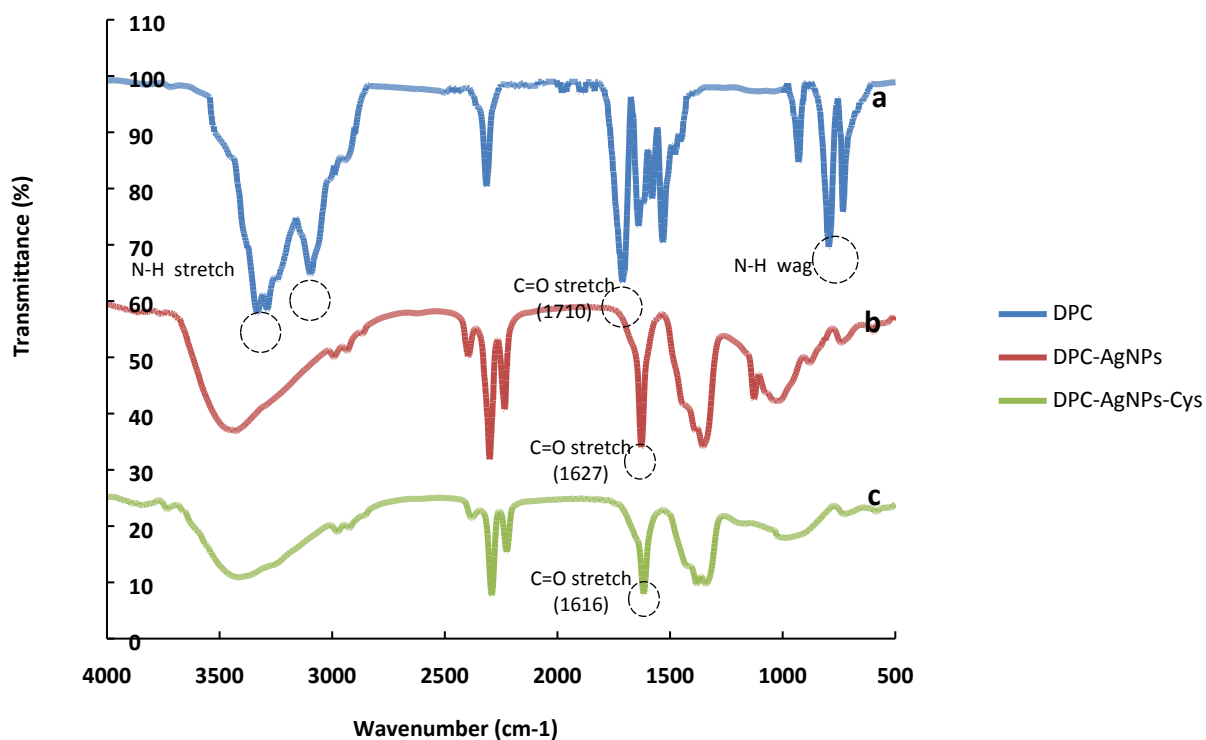

Fig. S2. FT-IR Spectra of (a) DPC, (b) DPC-AgNPs and (c) DPC-AgNPs-Cys
